# Supplementary material for: ER stress induces NLRP3 inflammasome activation and hepatocyte death
Source: PubMed Central journal article supplement (PMC4650444; doi:10.1038/cddis.2015.248), 2015-09-10

**A.**

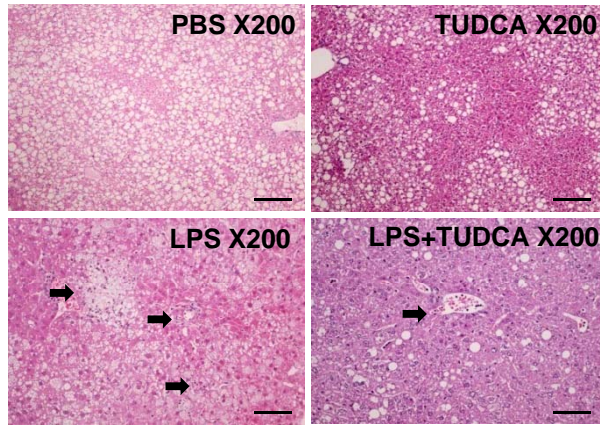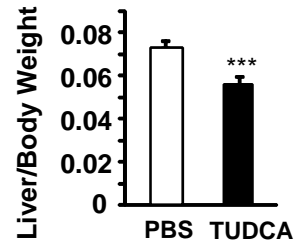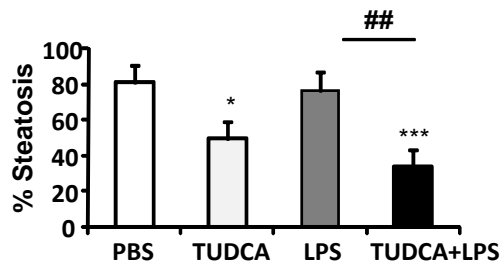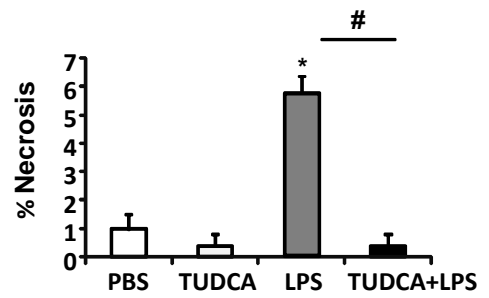

**B.**

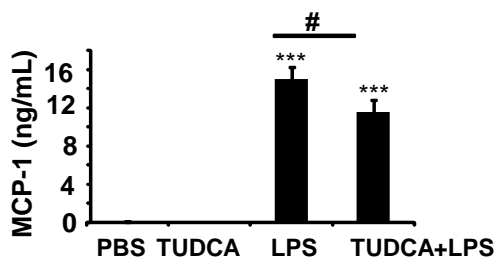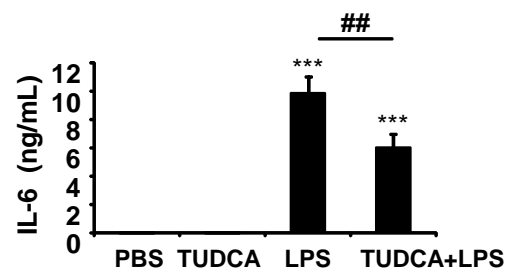

**A.**

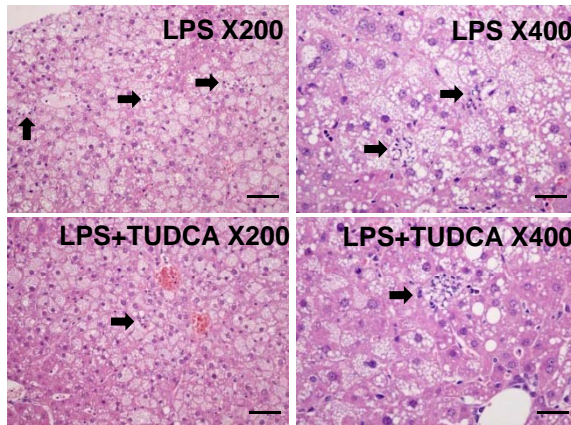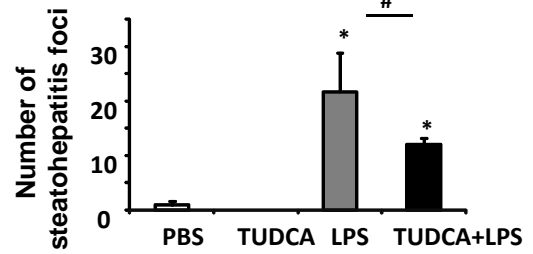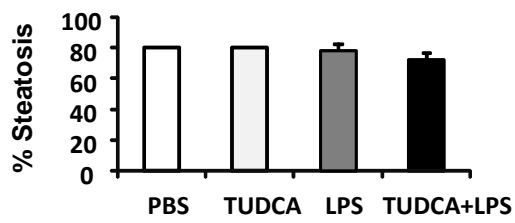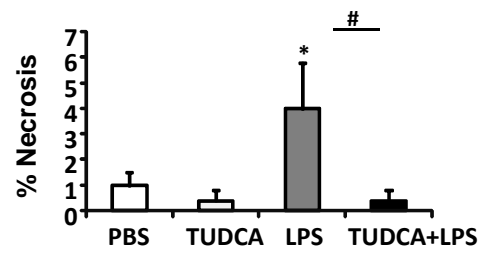

**B.**

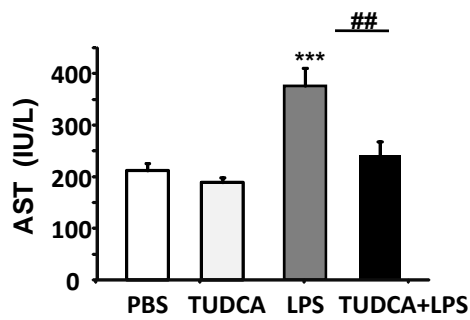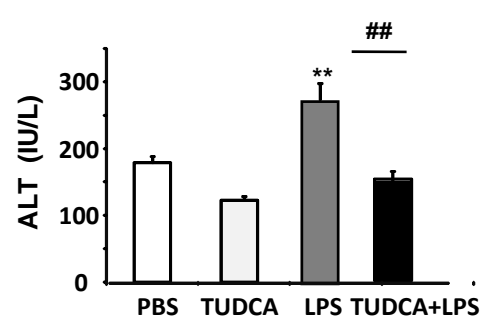

**C.**

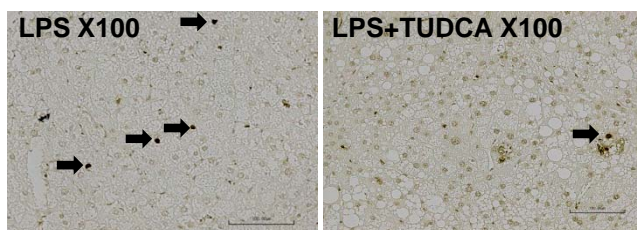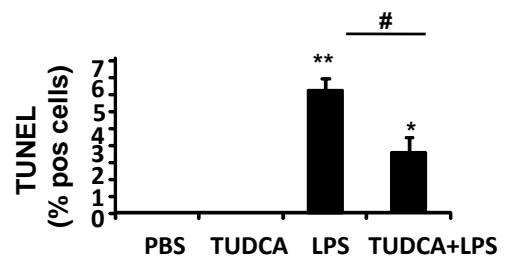

**A.**

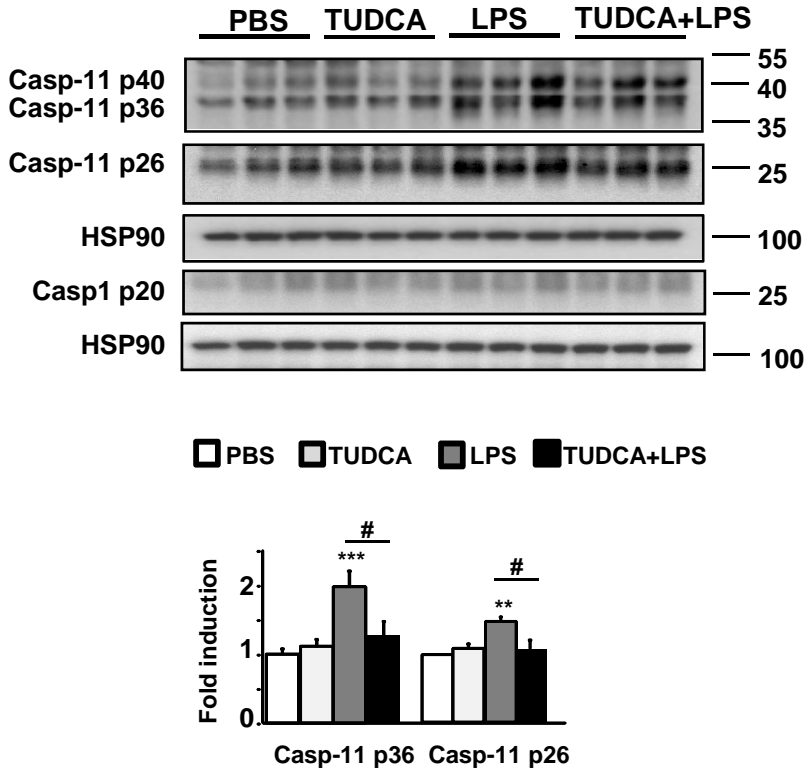

**B.**

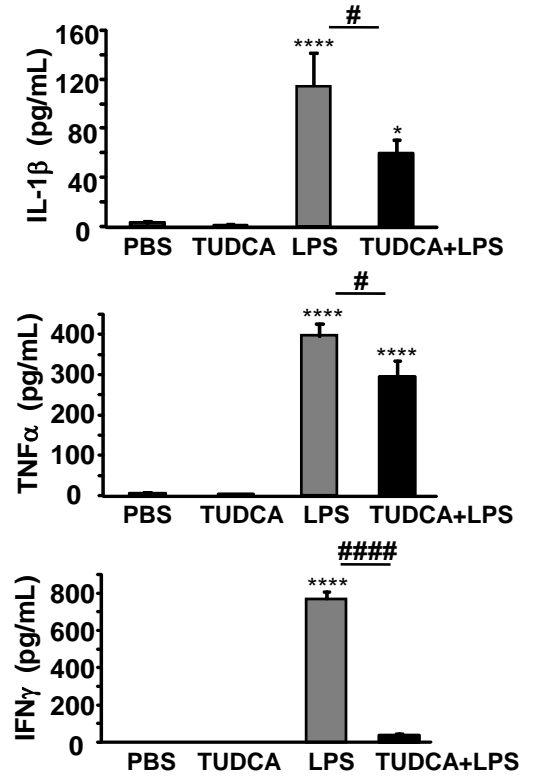

**C.**

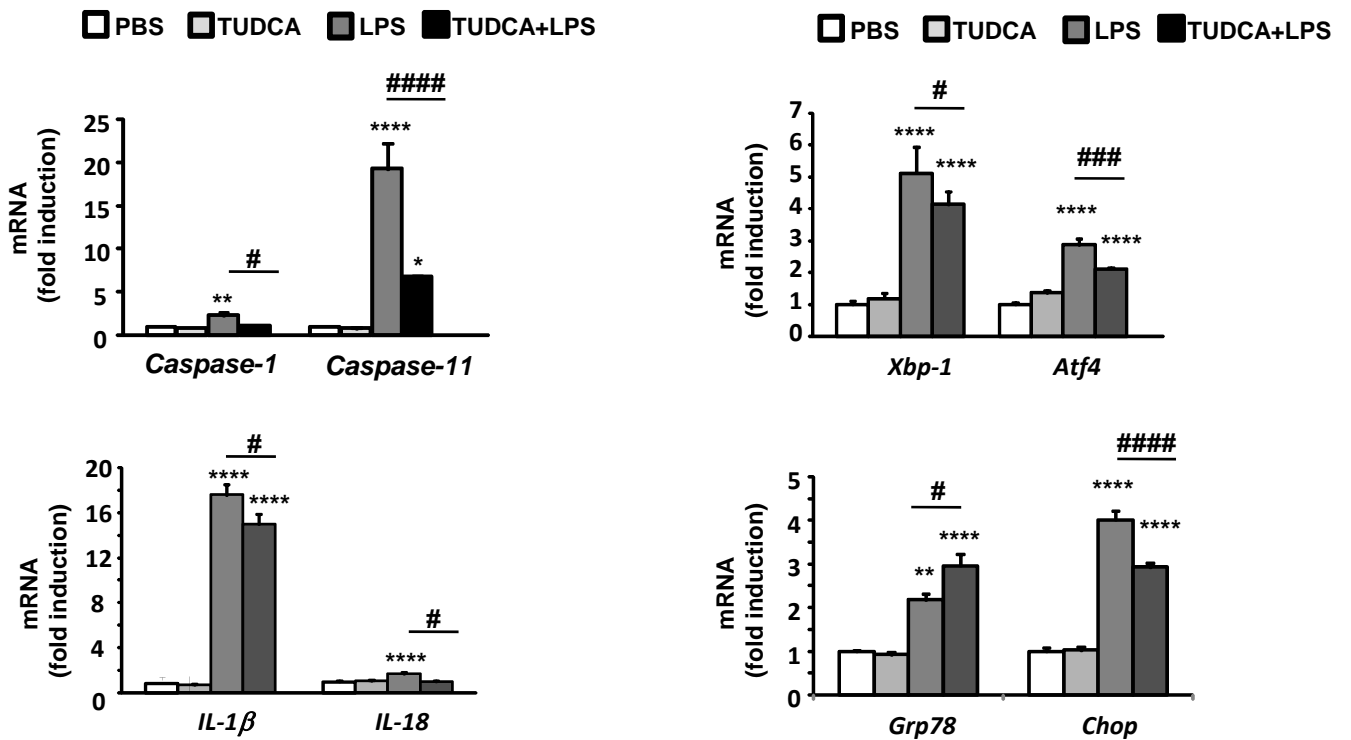

A.

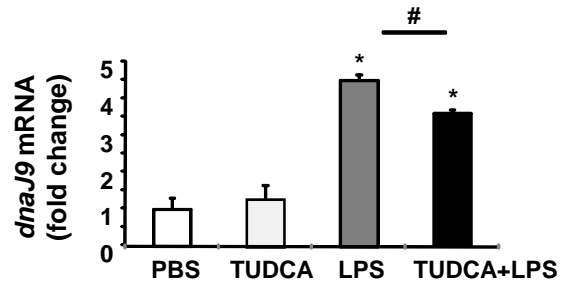

B.

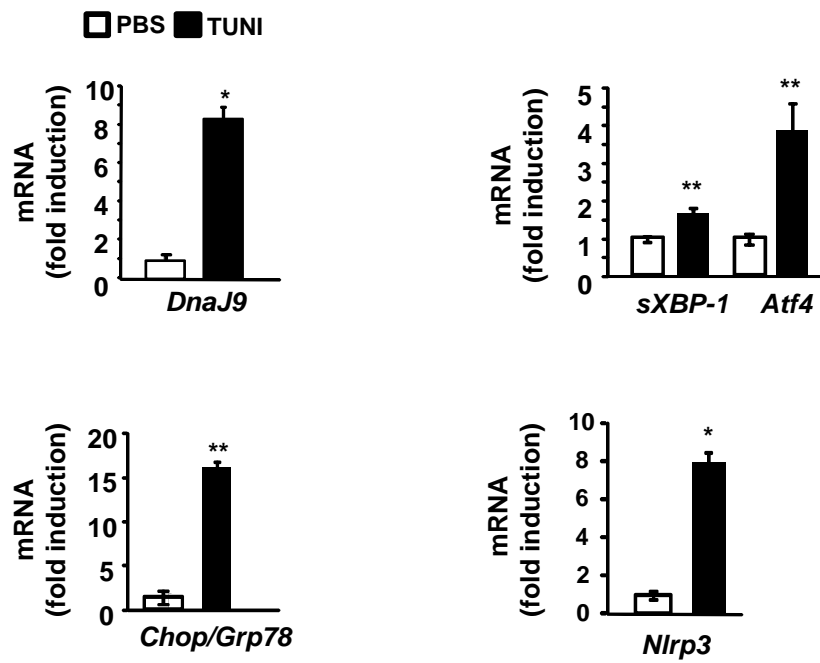

**A.**

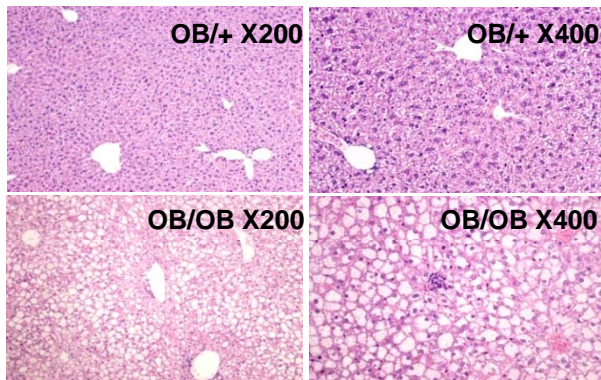

**B.**

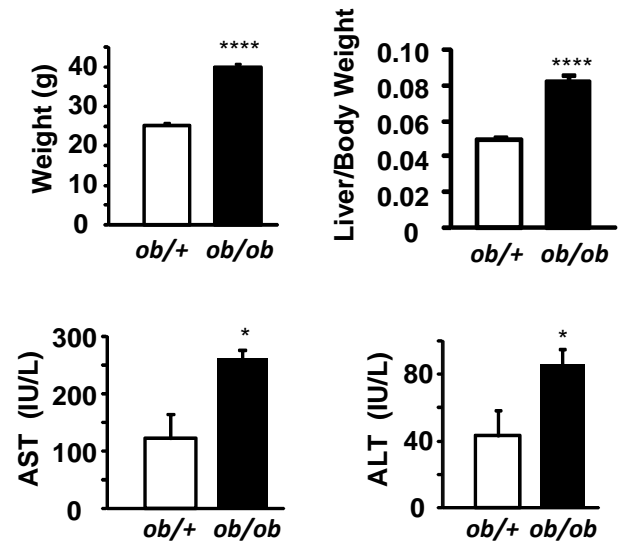

**C.**

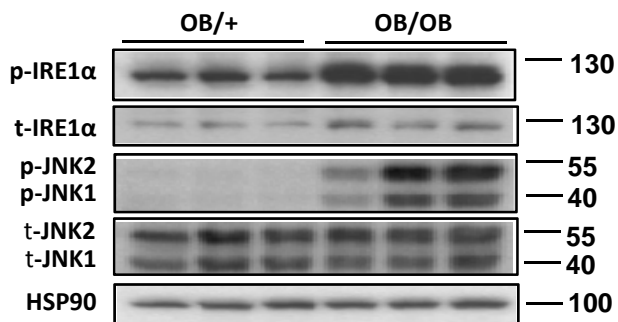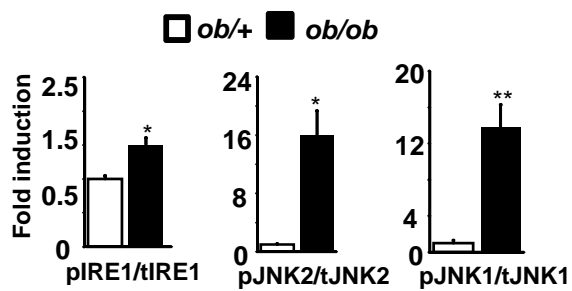

A.

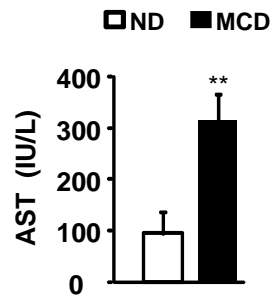

B.

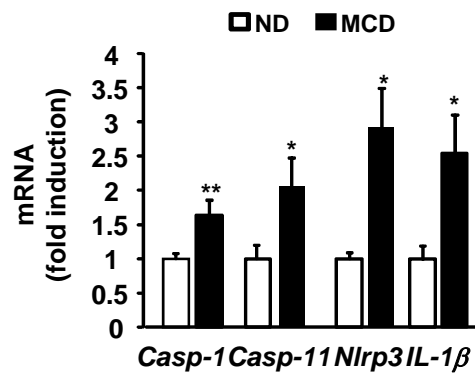

C.

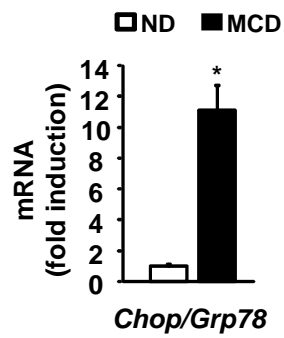

**A.**

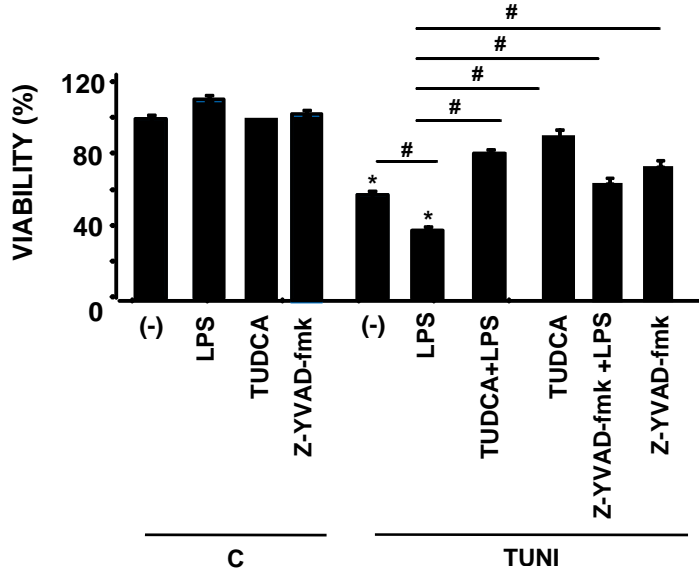

**B.**

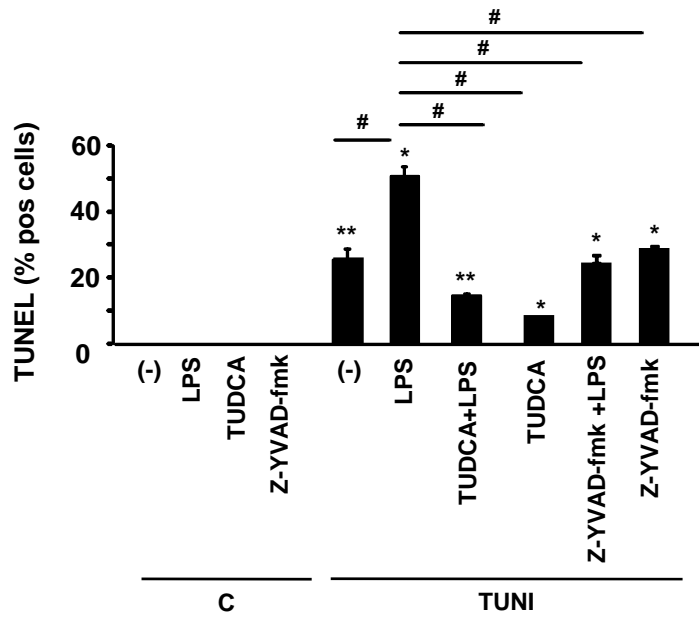

**A.**

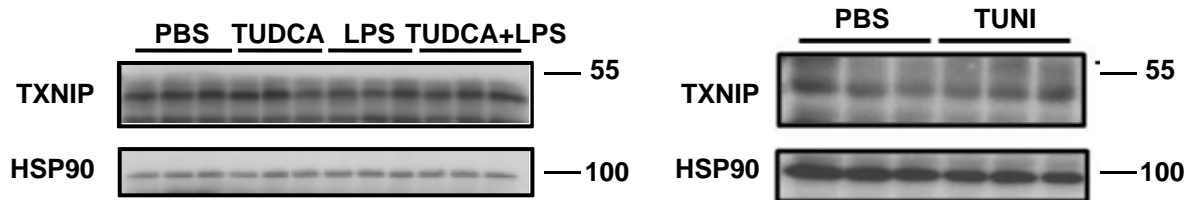

**B.**

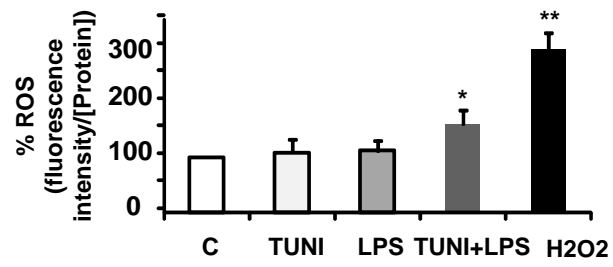

Supplement: cddis2015248x2.pdf [file cddis2015248x2.pdf]
